# Supplementary material for: Fc-comprising scDb-based trivalent, bispecific T-cell engagers for selective killing of HER3-expressing cancer cells independent of cytokine release
Source: PubMed Central journal article supplement — J Immunother Cancer. 2021 Nov 15;9(11):e003616. doi: 10.1136/jitc-2021-003616 (PMC8593740; doi:10.1136/jitc-2021-003616), 2021-11-15
Supplement: jitc-2021-003616supp001.pdf [file jitc-2021-003616supp001.pdf]

**Supplement Tables**

**Table S1: Yield of purified trivalent and bispecific molecules.** Nomenclature: 1 refers to the HER3 binding site, 2 refers to the CD3 binding site. Numbers in brackets refer to the binding sites of the scDb moiety (see Fig. 1).

| <b>Molecule</b>      | <b>Yield [mg/L]</b> |
|----------------------|---------------------|
| scDb/scFv-Fc (1-2)+1 | 3.7 – 8.5           |
| scDb/Fab-Fc (1-2)+1  | 4.8 – 12.3          |
| scDb/scFv-Fc (1-1)+2 | 1.2                 |
| scDb/Fab-Fc (1-1)+2  | 9.6 – 16.0          |
| scDb/scFv-Fc (2-1)+1 | 3.8                 |
| scDb/Fab-Fc (2-1)+1  | 7.2                 |

## Supplement Figures

Figure S1:

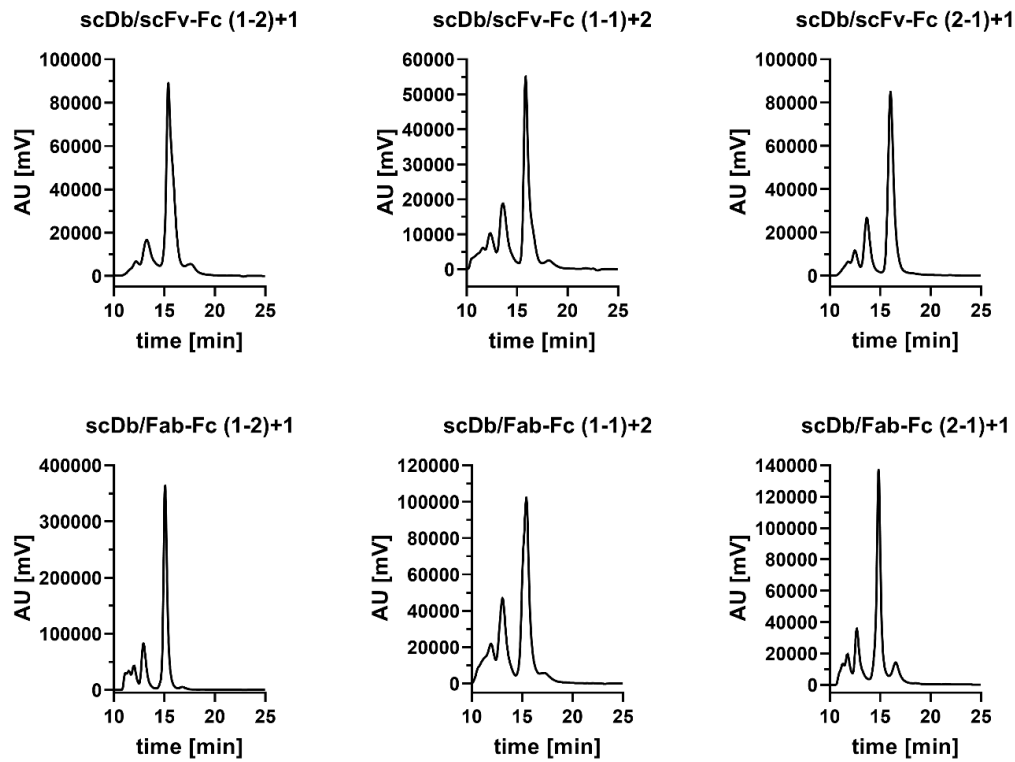

**Fig. S1: Size-exclusion chromatography of the protein A-purified trivalent bispecific molecules by HPLC using a Tosoh TSKgel SuperSW mAb HR column. Nomenclature: 1 refers to the HER3 binding site, 2 refers to the CD3 binding site. Numbers in brackets refer to the binding sites of the scDb moiety.**
